# Supplementary material
Source: MDPI journal article supplement (https://www.mdpi.com/2071-1050/14/8/4676)
Supplement: s1 [file s1]

Archive with 3 entries (3 files):
- S1 - input feature questionnaires.pdf
- S2 - interview questionnaire order.pdf
- S3 - workshop and interview structure.pdf
