# Supplementary material
Source: MDPI journal article supplement (https://www.mdpi.com/2071-1050/14/8/4676)
Supplement: s1 [file s1]

**Table:** Order of domains for each project coordinator interviewed

| Interview number | Order of questionnaires in each interview |                                                              |             |             |             |             |
|------------------|-------------------------------------------|--------------------------------------------------------------|-------------|-------------|-------------|-------------|
| 1                | General                                   | Science                                                      | Environment | Society     | Economy     | Governance  |
| 2                | General                                   | Environment                                                  | Science     | Economy     | Governance  | Society     |
| 3                | General                                   | Society                                                      | Economy     | Science     | Governance  | Environment |
| 4                | General                                   | Governance                                                   | Economy     | Environment | Society     | Science     |
| 5                | General                                   | Economy                                                      | Governance  | Environment | Science     | Society     |
| 6                | General                                   | Science                                                      | Society     | Governance  | Environment | Economy     |
| 7                | General                                   | Environment                                                  | Governance  | Science     | Society     | Economy     |
| 8                | General                                   | Society                                                      | Science     | Environment | Economy     | Governance  |
| 9                | General                                   | Economy                                                      | Environment | Society     | Governance  | Science     |
|                  | Domain                                    | Number of occurrences of each questionnaire in each position |             |             |             |             |
|                  | Society                                   | 2                                                            | 1           | 2           | 2           | 2           |
|                  | Governance                                | 1                                                            | 2           | 2           | 2           | 2           |
|                  | Economy                                   | 2                                                            | 2           | 1           | 2           | 2           |
|                  | Environment                               | 2                                                            | 2           | 2           | 2           | 1           |
|                  | Science                                   | 2                                                            | 2           | 2           | 1           | 2           |
